# Supplementary material for: Online Information of Vaccines: Information Quality, Not Only Privacy, Is an Ethical Responsibility of Search Engines
Source: Front Med (Lausanne). 2020 Aug 11;7:400. doi: 10.3389/fmed.2020.00400 (PMC7431660; doi:10.3389/fmed.2020.00400)
Supplement: Supplementary file 1 [file Table_1.XLSX]

## Sheet: Sheet1
			ENGLISH - URL												ENGLISH-STANCE
	rank	GoogleCOM	GoogleUK	Yahoo	Bing	Duckduck	Ecosia	Mojeek	Qwant	Swisscows			rank	GoogleCOM	GoogleUK	Yahoo	Bing	Duckduck	Ecosia	Mojeek	Qwant	Swisscows
	1	cdc.gov/vaccinesafety/concerns/autism.html	historyofvaccines.org/content/articles/do-vaccines-cause-autism	webmd.com/brain/autism/do-vaccines-cause-autism	en.wikipedia.org/wiki/MMR_vaccine_controversy	webmd.com/brain/autism/do-vaccines-cause-autism	en.wikipedia.org/wiki/MMR_vaccine_controversy	whale.to/vaccine/vaccine_autism_proven.html	en.wikipedia.org/wiki/MMR_vaccine_controversy	en.wikipedia.org/wiki/MMR_vaccine_controversy			1	pos	pos	pos	pos	pos	pos	neg	pos	pos
	2	chop.edu/centers-programs/vaccine-education-center/vaccines-and-other-conditions/vaccines-autism	nhs.uk/news/medication/no-link-between-mmr-and-autism-major-study-finds/	historyofvaccines.org/content/articles/do-vaccines-cause-autism	webmd.com/brain/autism/do-vaccines-cause-autism	en.wikipedia.org/wiki/MMR_vaccine_controversy	en.wikipedia.org/wiki/Vaccines_and_autism	vaccineriskawareness.com/Infant-Vaccines-Produce-Autism-Symptoms-In-Primates	webmd.com/brain/autism/do-vaccines-cause-autism	webmd.com/brain/autism/do-vaccines-cause-autism			2	pos	pos	pos	pos	pos	pos	neg	pos	pos
	3	immunize.org/autism/	nhs.uk/conditions/vaccinations/mmr-vaccine/	en.wikipedia.org/wiki/MMR_vaccine_controversy	cdc.gov/vaccinesafety/concerns/autism.html	babycenter.com/0_vaccines-and-autism-separating-fact-from-fiction_1470554.bc	cdc.gov/vaccinesafety/concerns/autism.html	leftbrainrightbrain.co.uk/2014/07/17/more-of-that-vaccineautism-research-that-doesnt-exist/	en.wikipedia.org/wiki/Vaccines_and_autism	en.wikipedia.org/wiki/Vaccines_and_autism			3	pos	pos	pos	pos	pos	pos	neg	pos	pos
	4	autismsciencefoundation.org/what-is-autism/autism-and-vaccines/	autism.org.uk/get-involved/media-centre/position-statements/mmr-vaccine.aspx	autismsciencefoundation.org/what-is-autism/autism-and-vaccines/	historyofvaccines.org/content/articles/do-vaccines-cause-autism	howdovaccinescauseautism.com	historyofvaccines.org/content/articles/do-vaccines-cause-autism	edition.cnn.com/2011/HEALTH/01/05/autism.vaccines/index.html	inews.co.uk/news/mmr-vaccine-autism-link-study-latest-anti-vaxx	historyofvaccines.org/content/articles/do-vaccines-cause-autism			4	pos	pos	pos	pos	pos	pos	pos	pos	pos
	5	annals.org/aim/fullarticle/2727726/measles-mumps-rubella-vaccination-autism-nationwide-cohort-study	kidshealth.org/en/parents/autism-studies.html	en.wikipedia.org/wiki/Vaccines_and_autism	autism.org.uk/get-involved/media-centre/position-statements/mmr-vaccine.aspx	autismcenter.org/vaccines-and-autism	inews.co.uk/news/mmr-vaccine-autism-link-study-latest-anti-vaxx	coasttocoastam.com/show/2018/02/21	autism.org.uk/get-involved/media-centre/position-statements/mmr-vaccine.aspx	inews.co.uk/news/mmr-vaccine-autism-link-study-latest-anti-vaxx			5	pos	pos	pos	pos	pos	pos	neg	pos	pos
	6	kidshealth.org/en/parents/autism-studies.html	vaccine-safety-training.org/mmr-vaccine-increases.html	dailymail.co.uk/health/article-5133049/Aluminium-vaccines-cause-autism.html	inews.co.uk/opinion/autism-mmr-vaccine-anti-vaxxers-compulsory	academic.oup.com/cid/article/48/4/456/284219	autism.org.uk/get-involved/media-centre/position-statements/mmr-vaccine.aspx	nocompulsoryvaccination.com/2014/08/22/vaccine-autism-cover-up/	historyofvaccines.org/content/articles/do-vaccines-cause-autism	autism.org.uk/get-involved/media-centre/position-statements/mmr-vaccine.aspx			6	pos	pos	neg	pos	pos	pos	neg	pos	pos
	7	publichealth.org/public-awareness/understanding-vaccines/vaccine-myths-debunked/	nejm.org/doi/full/10.1056/NEJMoa021134	cdc.gov/vaccinesafety/concerns/autism.html	sciencebasedmedicine.org/reference/vaccines-and-autism	ageofautism.com/2014/08/vaccines-cause-autism.html	academic.oup.com/cid/article/48/4/456/284219	newswars.com/vaccine-autism-questioned-by-doctor-congressman-elect/	inews.co.uk/opinion/autism-mmr-vaccine-anti-vaxxers-compulsory	academic.oup.com/cid/article/48/4/456/284219			7	pos	pos	pos	pos	neg	pos	neg	pos	pos
	8	historyofvaccines.org/content/articles/do-vaccines-cause-autism	ncbi.nlm.nih.gov/pubmed/30986133	academic.oup.com/cid/article/48/4/456/284219	dailymail.co.uk/health/article-5133049/Aluminium-vaccines-cause-autism.html	sciencebasedmedicine.org/reference/vaccines-and-autism/	nhs.uk/conditions/vaccinations/mmr-vaccine	vaxtruth.org/2011/08/vaccines-do-not-cause-autism/	cdc.gov/vaccinesafety/concerns/autism.html	nhs.uk/conditions/vaccinations/mmr-vaccine			8	pos	pos	pos	neg	pos	pos	neg	pos	pos
	9	ncbi.nlm.nih.gov/pmc/articles/PMC5789217/	ncbi.nlm.nih.gov/pubmed/15366972	inews.co.uk/news/mmr-vaccine-autism-link-study-latest-anti-vaxx/	academic.oup.com/cid/article/48/4/456/284219	cdc.gov/ncbddd/autism/research.html	sciencebasedmedicine.org/reference/vaccines-and-autism	physicsforums.com/threads/vaccine-and-autism-link.880852/	academic.oup.com/cid/article/48/4/456/284219	independent.co.uk/news/health/mmr-vaccine-autism-antivax-measles-study…			9	pos	pos	pos	pos	pos	pos	neutral	pos	pos
	10	autismcenter.org/vaccines-and-autism	chop.edu/centers-programs/vaccine-education-center/vaccines-and-other-conditions/vaccines-autism	autismspeaks.org/what-causes-autism	autismsciencefoundation.org/what-is-autism/autism-and-vaccines	cbsnews.com/news/vaccines-and-autism-a-new-scientific-review/	independent.co.uk/news/health/mmr-vaccine-autism-antivax-measles-study...	piecubed.co.uk/vaccines-and-autism-the-role-of-the-media-in-scientific-reporting/	futurism.com/the-byte/study-vaccines-dont-cause-autism	cdc.gov/vaccinesafety/concerns/autism.html			10	pos	pos	pos	pos	neutral	pos	pos	pos	pos
	11	nejm.org/doi/full/10.1056/NEJMoa021134	annals.org/aim/fullarticle/2727726/measles-mumps-rubella-vaccination-autism-nationwide-cohort-study	ageofautism.com/2014/08/vaccines-cause-autism.html	futurism.com/the-byte/study-vaccines-dont-cause-autism	immunize.org/autism/	inews.co.uk/opinion/autism-mmr-vaccine-anti-vaxxers-compulsory	vaxopedia.org/2016/09/04/autism-and-vaccines/	nhs.uk/conditions/vaccinations/mmr-vaccine	sciencebasedmedicine.org/reference/vaccines-and-autism			11	pos	pos	neg	pos	pos	pos	pos	pos	pos
	12	nejm.org/doi/full/10.1056/nejmp0802904	cdc.gov/ncbddd/autism/topics.html	sciencebasedmedicine.org/reference/vaccines-and-autism/	babycenter.com/0_vaccines-and-autism-separating-fact-from-fiction_1470554.bc	autismspeaks.org/what-causes-autism	futurism.com/the-byte/study-vaccines-dont-cause-autism	psychiatric-disorders.com/autism/autism-and-vaccinations/	autismsciencefoundation.org/what-is-autism/autism-and-vaccines	inews.co.uk/opinion/autism-mmr-vaccine-anti-vaxxers-compulsory			12	pos	pos	pos	pos	pos	pos	neg	pos	pos
	13	statnews.com/2019/03/04/vaccines-no-association-autism-major-study	publichealth.org/public-awareness/understanding-vaccines/vaccine-myths-debunked	theguardian.com/society/2019/jun/01/professor-who-links-vaccines-to-autism-funded-through-university-portal	ageofautism.com/2014/08/vaccines-cause-autism.html	futurism.com/the-byte/study-vaccines-dont-cause-autism	autismsciencefoundation.org/what-is-autism/autism-and-vaccines	cdc.gov/vaccinesafety/concerns/autism.html	sciencebasedmedicine.org/reference/vaccines-and-autism	futurism.com/the-byte/study-vaccines-dont-cause-autism			13	pos	pos	neutral	neg	pos	pos	pos	pos	pos
	14	webmd.com/brain/autism/do-vaccines-cause-autism	medicalnewstoday.com/articles/324619.php	chop.edu/centers-programs/vaccine-education-center/vaccines-and-other-conditions/vaccines-autism	howdovaccinescauseautism.com	thetruthaboutcancer.com/vaccines-and-autism/	cdc.gov/ncbddd/autism/research.html	silverbulletin.utopiasilver.com/movie-investigates-vaccine-autism-implications/	independent.co.uk/news/health/mmr-vaccine-autism-antivax-measles-study...	autismsciencefoundation.org/what-is-autism/autism-and-vaccines			14	pos	pos	pos	pos	neg	pos	neg	pos	pos
	15	aappublications.org/news/2019/03/05/mmrautism030519	pharmatimes.com/news/major_study_again_disproves_myth_that_vaccinations_cause_autism_1280459	naturalnews.com/027178_vaccines_autism_NaturalPedia.html	nhs.uk/news/pregnancy-and-child/mmr-vaccine-does-not-cause-autism	en.wikipedia.org/wiki/Vaccines_and_autism	nhs.uk/news/pregnancy-and-child/mmr-vaccine-does-not-cause-autism	discovermagazine.com/2009/jun/06-why-does-vaccine-autism-controversy-live-on	nhs.uk/news/pregnancy-and-child/mmr-vaccine-does-not-cause-autism	cdc.gov/ncbddd/autism/research.html			15	pos	pos	neg	pos	pos	pos	neutral	pos	pos
	16	healthychildren.org/English/safety-prevention/immunizations/Pages/Vaccine-Studies-Examine-the-Evidence.aspx	theguardian.com/society/2019/jun/01/professor-who-links-vaccines-to-autism-funded-through-university-portal	babycenter.com/0_vaccines-and-autism-separating-fact-from-fiction_1470554.bc	cdc.gov/ncbddd/autism/research.html	drugs.com/slideshow/vaccines-autism-link-1168	precisionvaccinations.com/mmr-vaccine-does-not-cause-autism-says-cdc	engineeringevil.com/2014/08/26/autism-vaccine-cover-up-snowballs-as-whistleblowers-identity-is-revealed-latest-updates/	sciencenewsforstudents.org/article/explainer-vaccines-are-not-linked-autism	dailymail.co.uk/health/article-5133049/Aluminium-vaccines-cause-autism.			16	pos	neutral	pos	pos	pos	pos	neg	pos	neg
	17	autismspeaks.org/science-news/no-mmr-autism-link-large-study-vaccinated-vs-unvaccinated-kids	healthychildren.org/English/safety-prevention/immunizations/Pages/Vaccine-Studies-Examine-the-Evidence.aspx	howvaccinescauseautism.org/	focusforhealth.org/autism-and-vaccine-debate	usatoday.com/story/news/health/2019/03/05/vaccines-autism-measles-shots-dont-increase-risk-study/3064073002/	ageofautism.com/2014/08/vaccines-cause-autism.html	bewitchingkitchen.com/tag/vaccine-and-autism/	cdc.gov/ncbddd/autism/research.html	nhs.uk/news/pregnancy-and-child/mmr-vaccine-does-not-cause-autism			17	pos	pos	pos	neg	pos	neg	pos	pos	pos
	18	livescience.com/64909-measles-vaccine-not-linked-to-autism.html	bmj.com/content/342/bmj.c7452	forbes.com/sites/timworstall/2011/11/18/vaccines-and-autism/	sciencenewsforstudents.org/article/explainer-vaccines-are-not-linked-autism	time.com/5175704/andrew-wakefield-vaccine-autism/	livescience.com/64909-measles-vaccine-not-linked-to-autism.html	autismsd.com/vaccines-and-autism/	dailymail.co.uk/health/article-5133049/Aluminium-vaccines-cause-autism.	ageofautism.com/2014/08/vaccines-cause-autism.html			18	pos	pos	pos	pos	pos	pos	pos	neg	neg
	19	health.ny.gov/prevention/immunization/vaccine_safety/truth_about_autism.htm	bandolier.org.uk/booth/Vaccines/noMMR.html	howdovaccinescauseautism.com/	voicesforvaccines.org/mmr-and-autism-our-story	focusforhealth.org/autism-and-vaccine-debate/	dailymail.co.uk/health/article-5133049/Aluminium-vaccines-cause-autism.	howdovaccinescauseautism.com/	babycenter.com/0_vaccines-and-autism-separating-fact-from-fiction_1470554.bc	precisionvaccinations.com/mmr-vaccine-does-not-cause-autism-says-cdc			19	pos	pos	pos	pos	neg	neg	pos	pos	pos
	20	nationalacademies.org/hmd/reports/2004/immunization-safety-review-vaccines-and-autism.aspx	en.wikipedia.org/wiki/MMR_vaccine_and_autism	statnews.com/2019/03/04/vaccines-no-association-autism-major-study/	cbsnews.com/news/vaccines-and-autism	vaccinesafety.edu/vs-autism.htm	sciencenewsforstudents.org/article/explainer-vaccines-are-not-linked-autism	thenhf.co.uk/vaccine-hazards-awareness-campaign/	livescience.com/64909-measles-vaccine-not-linked-to-autism.html	sciencenewsforstudents.org/article/explainer-vaccines-are-not-linked-autism			20	pos	pos	pos	pos	pos	pos	neg	pos	pos
	21	npr.org/sections/health-shots/2019/03/04/699997613/a-large-study-provides-more-evidence-that-mmr-vaccines-dont-cause-autism	immunize.org/autism	verywellhealth.com/the-mmr-vaccination-autism-controversy-260556	naturalnews.com/2019-03-10-aluminum-in-vaccines-causes-autism.html	pbs.org/wgbh/nova/body/autism-vaccine-myth.html	babycenter.com/0_vaccines-and-autism-separating-fact-from-fiction_1470554.bc	ecso.org/news/autism-charity-founder-anti-vaccination-campaigner/	chop.edu/.../vaccines-and-other-conditions/vaccines-autism	livescience.com/64909-measles-vaccine-not-linked-to-autism.html			21	pos	pos	pos	neg	pos	pos	neutral	pos	pos
	22	nytimes.com/2019/03/05/health/measles-vaccine-autism.html	en.wikipedia.org/wiki/Vaccines_and_autism	thinkingmomsrevolution.com/scientific-proof-vaccines-cause-autism/	learntherisk.org/autism	livescience.com/64909-measles-vaccine-not-linked-to-autism.html	naturalnews.com/2019-03-10-aluminum-in-vaccines-causes-autism.html	endoftheamericandream.com/archives/vaccines-and-autism-the-secret-that-you-are-not-supposed-to-know	precisionvaccinations.com/mmr-vaccine-does-not-cause-autism-says-cdc	babycenter.com/0_vaccines-and-autism-separating-fact-from-fiction_1470554.bc			22	pos	pos	neg	neg	pos	neg	neg	pos	pos
	23	nbcnews.com/health/kids-health/another-study-finds-no-link-between-autism-measles-mumps-rubella-n979176	autismspeaks.org/what-causes-autism	drugs.com/slideshow/vaccines-autism-link-1168	statnews.com/2019/03/04/vaccines-no-association-autism-major-study	naturalnews.com/2019-03-10-aluminum-in-vaccines-causes-autism.html	cbsnews.com/news/vaccines-and-autism	vaccinenation.org/2014/09/23/vaccines-autism-infographic/	cbsnews.com/news/leading-dr-vaccines-autism-worth-study	voicesforvaccines.org/mmr-and-autism-our-story			23	pos	pos	pos	pos	neg	pos	pos	neg	pos
	24	cnn.com/2019/03/04/health/mmr-vaccine-autism-study/index.html	mayoclinic.org/healthy-lifestyle/infant-and-toddler-health/in-depth/vaccines/art-20048334	autismcenter.org/vaccines-and-autism	autismspeaks.org/what-causes-autism	cbsnews.com/news/the-open-question-on-vaccines-and-autism/	autismspeaks.org/what-causes-autism	healingourchildren.org/vaccines-cause-autism/	autismspeaks.org/what-causes-autism	cbsnews.com/news/vaccines-and-autism			24	pos	pos	pos	pos	neutral	pos	neg	pos	pos
	25	sciencebasedmedicine.org/reference/vaccines-and-autism	en.m.wikipedia.org/wiki/Causes_of_autism	avn.org.au/information/vaccine-injury/autism-and-vaccines/	drugs.com/slideshow/vaccines-autism-link-1168	healthychildren.org/English/safety-prevention/immunizations/Pages/Vaccine-Studies-Examine-the-Evidence.aspx	drugs.com/slideshow/vaccines-autism-link-1168	bristolautismsupport.com/tag/autism-and-vaccines/	cbsnews.com/news/vaccines-and-autism	naturalnews.com/2019-03-10-aluminum-in-vaccines-causes-autism.html			25	pos	pos	neg	pos	pos	pos	pos	pos	neg
	26	vaccinesafety.edu/vs-autism.htm	en.m.wikipedia.org/wiki/MMR_vaccine	spectator.us/vaccines-autism/	thegreatcoursesdaily.com/vaccines-cause-autism	spectator.us/vaccines-autism/	statnews.com/2019/03/04/vaccines-no-association-autism-major-study	ungodly.com/cartoons/vaccines_autism_a_rant_and_a_thought.php	statnews.com/2019/03/04/vaccines-no-association-autism-major-study	autismspeaks.org/what-causes-autism			26	pos	pos	pos	pos	pos	pos	pos	pos	pos
	27	healthcare-management-degree.net/autism-vaccines	en.m.wikipedia.org/wiki/Measles_vaccine	independent.co.uk/news/world/americas/trump-vaccines-autism-links-anti-vaxxer-us-president-false-vaccine-a8331836.html	thetruthaboutcancer.com/vaccines-and-autism	precisionvaccinations.com/mmr-vaccine-does-not-cause-autism-says-cdc	chop.edu/.../vaccines-and-other-conditions/vaccines-autism	beforeitsnews.com/health/2017/02/extraordinary-vaccine-autism-evidence-uncovered-2709234.html	naturalnews.com/2019-03-10-aluminum-in-vaccines-causes-autism.html	howdovaccinescauseautism.com			27	pos	pos	neutral	neg	pos	pos	neg	neg	pos
	28	usatoday.com/story/news/health/2019/03/05/vaccines-autism-measles-shots-dont-increase-risk-study/3064073002	autismcenter.org/vaccines-and-autism	focusforhealth.org/autism-and-vaccine-debate/	forrestmaready.com/the-autism-vaccine	learntherisk.org/autism/	howdovaccinescauseautism.com	greatergoodmovie.org/video/vaccine-beat-1-autism-and-the-thinking-moms-revolution/	ageofautism.com/2014/08/vaccines-cause-autism.html	drugs.com/slideshow/vaccines-autism-link-1168			28	pos	pos	neg	neg	neg	pos	neg	neg	pos
	29	time.com/5542201/measles-vaccine-autism-no-link	academic.oup.com/labmed/article-pdf/33/9/708/26076850/labmed33-0708.pdf	ncbi.nlm.nih.gov/pmc/articles/PMC2376879/	chop.edu/centers-programs/vaccine-education-center/vaccines-and-other-conditions/vaccines-autism	statnews.com/2019/03/04/vaccines-no-association-autism-major-study/	voicesforvaccines.org/mmr-and-autism-our-story	vaccinationinformationnetwork.com/vaccines-cause-autism-supporting-evidence/	howdovaccinescauseautism.com	learntherisk.org/autism			29	pos	neg	neutral	pos	pos	pos	neg	pos	neg
	30	mayoclinic.org/healthy-lifestyle/infant-and-toddler-health/in-depth/vaccines/art-20048334	thelancet.com/journals/lancet/article/PIIS0140673605756968/fulltext	ageofautism.com/the-vaccine-autism-link.html	usatoday.com/story/news/health/2019/03/05/vaccines-autism-measles-shots-dont-increase-risk-study/3064073002	nytimes.com/2019/03/05/health/measles-vaccine-autism.html	ncbi.nlm.nih.gov/pmc/articles/PMC3136032	erkatmusings.co.uk/vaccinations-autism-and-the-link/	voicesforvaccines.org/mmr-and-autism-our-story	focusforhealth.org/autism-and-vaccine-debate			30	pos	neg	neg	pos	pos	pos	pos	pos	neg
			ITALIAN - URL												ITALIAN-STANCE
	rank	Google	Yahoo	Bing	Duckduck	Qwant	Virgilio	Arianna					rank	Google.it	Yahoo	Bing	Duckduck	Qwant	Virgilio	Arianna
	1	https://www.fondazioneveronesi.it/magazine/articoli/pediatria/vaccino-mpr-e-autismo-un-nuovo-studio-esclude-legami	https://www.wired.it/scienza/medicina/2016/07/01/vaccini-autismo-storia-bufala/	https://autismovaccini.org	https://www.wired.it/scienza/medicina/2016/07/01/vaccini-autismo-storia-bufala/	https://autismovaccini.org/	https://autismovaccini.org	https://autismovaccini.org					1	pos	pos	neg	pos	neg	neg	neg
	2	https://www.corriere.it/salute/pediatria/19_marzo_05/i-vaccini-non-provocano-l-autismo-conferma-un-nuovo-studio-d50f7c82-3f3d-11e9-9358-da33396dc219.shtml	https://autismovaccini.org/	https://www.wired.it/scienza/medicina/2016/07/01/vaccini-autismo-storia-bufala	https://autismovaccini.org	https://www.wired.it/scienza/medicina/2016/07/01/vaccini-autismo-storia-bufala/	https://www.wired.it/scienza/medicina/2016/07/01/vaccini-autismo-storia-bufala	https://www.wired.it/scienza/medicina/2016/07/01/vaccini-autismo-storia-bufala					2	pos	neg	pos	neg	pos	pos	pos
	3	https://www.focus.it/scienza/salute/vaccino-mpr-autismo-studio-nessun-legame	https://www.vaccinarsi.org/scienza-conoscenza/contro-la-disinformazione/vaccini-non-causano-autismo	https://www.vaccinarsi.org/.../contro-la-disinformazione/vaccini-non-causano-autismo	https://www.vaccinarsi.org/scienza-conoscenza/contro-la-disinformazione/vaccini-non-causano-autismo	https://it-it.facebook.com/autismovaccini/	https://www.vaccinarsi.org/.../contro-la-disinformazione/vaccini-non-causano-autismo	https://www.vaccinarsi.org/.../contro-la-disinformazione/vaccini-non-causano-autismo					3	pos	pos	pos	pos	neg	pos	pos
	4	https://www.vanityfair.it/news/cronache/2019/03/05/vaccino-autismo-ricerca-conferma-nessun-legame	https://www.epicentro.iss.it/vaccini/autismo	https://www.epicentro.iss.it/vaccini/autismo	https://www.epicentro.iss.it/vaccini/autismo	https://www.agi.it/salute/vaccini_bambini_e_autismo_storia_di_una_bufala-1987339/news/2017-07-26/	http://www.pernoiautistici.com/2017/07/lautismo-cosa-e-cosa-lo-provoca-e-perche-i-vaccini-non-centrano-niente/	http://www.pernoiautistici.com/2017/07/lautismo-cosa-e-cosa-lo-provoca-e-perche-i-vaccini-non-centrano-niente/					4	pos	pos	pos	pos	pos	pos	pos
	5	https://www.sip.it/2018/04/24/settimana-europea-delle-vaccinazioni-autismo-nasce-la-teoria-del-complotto/	https://www.amicidelbambinomalato.it/susanna-esposito-vaccini-autismo/	https://www.amicidelbambinomalato.it/susanna-esposito-vaccini-autismo	https://www.amicidelbambinomalato.it/susanna-esposito-vaccini-autismo/	http://www.fondazione-autismo.it/ancora-su-autismo-e-vaccini/	https://www.agi.it/salute/vaccini_bambini_e_autismo_storia_di_una_bufala-1987339/news/2017-07-26/	https://www.agi.it/salute/vaccini_bambini_e_autismo_storia_di_una_bufala-1987339/news/2017-07-26/					5	POS	pos	pos	pos	pos	pos	pos
	6	https://www.wired.it/scienza/medicina/2019/03/05/vaccino-mpr-no-autismo/	http://www.fondazione-autismo.it/ancora-su-autismo-e-vaccini/	https://www.focus.it/scienza/salute/vaccini-e-autismo-un-nuovo-caso-di-pseudoscienza	www.fondazione-autismo.it/ancora-su-autismo-e-vaccini/	https://www.vaccinarsi.org/scienza-conoscenza/contro-la-disinformazione/vaccini-non-causano-autismo	www.fondazione-autismo.it/ancora-su-autismo-e-vaccini	www.fondazione-autismo.it/ancora-su-autismo-e-vaccini					6	pos	pos	pos	pos	pos	pos	pos
	7	https://www.wired.it/lifestyle/salute/2018/07/26/cassazione-vaccini-no-autismo/	https://www.scienzaeconoscenza.it/blog/critica-sistema-sanitario-industria-farmaceutica/vaccini-autismo-montagnier	www.mednat.org/vaccini/autismo_conferme.htm	https://www.scienzaeconoscenza.it/blog/critica-sistema-sanitario-industria-farmaceutica/vaccini-autismo-montagnier	http://www.pernoiautistici.com/2017/07/lautismo-cosa-e-cosa-lo-provoca-e-perche-i-vaccini-non-centrano-niente/	https://www.epicentro.iss.it/vaccini/autismo	https://www.epicentro.iss.it/vaccini/autismo					7	neutral	neg	neg	neg	pos	pos	pos
	8	https://www.vaccinarsi.org/scienza-conoscenza/contro-la-disinformazione/vaccini-non-causano-autismo	http://www.mednat.org/vaccini/autismo_conferme.htm	www.mednat.org/vaccini/autismo.htm	www.mednat.org/vaccini/autismo_conferme.htm	http://www.emergenzautismo.org/content/view/859/48/	https://www.epicentro.iss.it/vaccini/MPR_autismo	https://www.epicentro.iss.it/vaccini/MPR_autismo					8	pos	neg	neg	neg	neg	pos	pos
	9	http://www.ansa.it/canale_saluteebenessere/notizie/medicina/2018/10/18/vaccini-e-autismo-a-wakefield-premio-peggior-pseudoscienza_9ee580a1-3535-45df-ae8e-e2e20f696377.html	http://www.mednat.org/vaccini/autismo.htm	www.fondazione-autismo.it/ancora-su-autismo-e-vaccini	www.mednat.org/vaccini/autismo.htm	https://www.gruppomacro.com/blog/cure-alternative/autismo-vaccini-bambini-danni	https://www.susannaesposito.it/vaccini-autismo-realta-falsi-miti	https://www.susannaesposito.it/vaccini-autismo-realta-falsi-miti					9	pos	neg	pos	neg	neg	pos	pos
	10	https://www.ilmessaggero.it/salute/prevenzione/cassazione_vaccini_autismo_ricorso_respinto-4248494.html	https://www.corriere.it/salute/pediatria/19_marzo_05/i-vaccini-non-provocano-l-autismo-conferma-un-nuovo-studio-d50f7c82-3f3d-11e9-9358-da33396dc219.shtml	https://www.epicentro.iss.it/vaccini/VaccinazioniAutismo2013	https://www.corriere.it/salute/pediatria/19_marzo_05/i-vaccini-non-provocano-l-autismo-conferma-un-nuovo-studio-d50f7c82-3f3d-11e9-9358-da33396dc219.shtml	https://www.epicentro.iss.it/vaccini/autismo	https://www.gruppomacro.com/blog/cure-alternative/autismo-vaccini-bambini-danni	https://www.gruppomacro.com/blog/cure-alternative/autismo-vaccini-bambini-danni					10	neutral	pos	pos	pos	pos	neg	neg
	11	https://thevision.com/scienza/bambini-vaccini-autismo/	http://www.pernoiautistici.com/2017/07/lautismo-cosa-e-cosa-lo-provoca-e-perche-i-vaccini-non-centrano-niente/	https://www.scienzaeconoscenza.it/blog/critica-sistema-sanitario-industria-farmaceutica/vaccini-autismo-montagnier	https://www.nostrofiglio.it/neonato/vaccinazioni-ai-bambini/vaccini-e-autismo-un-nuovo-studio-smonta-definitivamente-la-bufala	https://www.amicidelbambinomalato.it/susanna-esposito-vaccini-autismo/	https://www.ilpost.it/2014/03/24/vaccini-autismo	https://www.ilpost.it/2014/03/24/vaccini-autismo					11	pos	pos	neg	pos	pos	pos	pos
	12	http://www.salute.gov.it/portale/news/p3_2_1_1_1.jsp?lingua=italiano&menu=notizie&p=dalministero&id=1524	https://www.nostrofiglio.it/neonato/vaccinazioni-ai-bambini/vaccini-e-autismo-un-nuovo-studio-smonta-definitivamente-la-bufala	https://www.corriere.it/salute/pediatria/19_marzo_05/i-vaccini-non-provocano-l-autismo-conferma-un-nuovo-studio-d50f7c82-3f3d-11e9-9358-da33396dc219.shtml	www.pernoiautistici.com/2017/07/lautismo-cosa-e-cosa-lo-provoca-e-perche-i-vaccini-non-centrano-niente/	https://www.epicentro.iss.it/vaccini/MPR_autismo	www.emergenzautismo.org/content/view/859/48	www.emergenzautismo.org/content/view/859/48					12	pos	pos	pos	pos	pos	neg	neg
	13	https://www.repubblica.it/cronaca/2018/07/25/news/cassazione_vaccini_no_nesso_autismo_indennizzo-202642132/	https://www.agi.it/salute/vaccini_bambini_e_autismo_storia_di_una_bufala-1987339/news/2017-07-26/	https://www.nostrofiglio.it/neonato/vaccinazioni-ai-bambini/vaccini-e-autismo-un-nuovo-studio-smonta-definitivamente-la-bufala	https://www.agi.it/salute/vaccini_bambini_e_autismo_storia_di_una_bufala-1987339/news/2017-07-26/	http://digrazia-lescienze.blogautore.espresso.repubblica.it/2014/11/29/il-vaccino-causa-lautismo-cosi-e-deciso/	https://www.amicidelbambinomalato.it/susanna-esposito-vaccini-autismo	https://www.amicidelbambinomalato.it/susanna-esposito-vaccini-autismo					13	neutral	pos	pos	pos	neutral	pos	pos
	14	https://it.wikipedia.org/wiki/Andrew_Wakefield	http://www.informasalus.it/it/articoli/vaccini-autismo-studio-wakefield.php	www.informasalus.it/it/articoli/vaccini-autismo-studio-wakefield.php	www.informasalus.it/it/articoli/vaccini-autismo-studio-wakefield.php	https://www.ilpost.it/2014/03/24/vaccini-autismo/	http://digrazia-lescienze.blogautore.espresso.repubblica.it/2014/11/29/il-vaccino-causa-lautismo-cosi-e-deciso/comment-page-3/	https://it-it.facebook.com/autismovaccini					14	pos	neg	neg	neg	pos	pos	neg
	15	https://www.agi.it/estero/vaccino_morbillo_autismo-5092033/news/2019-03-05/	http://www.emergenzautismo.org/content/view/859/48/	https://www.ilmattino.it/primopiano/sanita/vaccini_autismo_roberto_burioni_studio_nature-2296623.html	www.emergenzautismo.org/content/view/859/48/	https://www.susannaesposito.it/vaccini-autismo-realta-falsi-miti/	www.mednat.org/vaccini/autismo_conferme.htm	www.mednat.org/vaccini/autismo_conferme.htm					15	pos	neg	pos	neg	pos	neg	neg
	16	https://www.agi.it/cronaca/vaccini_autismo_procura_roma-4470292/news/2018-10-10/	https://www.stateofmind.it/tag/autismo/	https://www.fondazioneveronesi.it/magazine/articoli/pediatria/vaccino-mpr-e-autismo-un-nuovo-studio-esclude-legami	https://www.stateofmind.it/tag/autismo/	http://www.informasalus.it/it/articoli/vaccini-autismo-studio-wakefield.php	https://it-it.facebook.com/autismovaccini	www.informasalus.it/it/articoli/vaccini-autismo-studio-wakefield.php					16	neutral	neutral	pos	neutral	neg	neg	neg
	17	http://www.psychiatryonline.it/node/7931	https://www.issalute.it/index.php/falsi-miti-e-bufale/i-vaccini/250-i-vaccini-fanno-venire-l-autismo	https://www.disinformazione.it/vaccinieautismo.htm	https://www.issalute.it/index.php/falsi-miti-e-bufale/i-vaccini/250-i-vaccini-fanno-venire-l-autismo	https://www.issalute.it/index.php/falsi-miti-e-bufale/i-vaccini/250-i-vaccini-fanno-venire-l-autismo	www.informasalus.it/it/articoli/vaccini-autismo-studio-wakefield.php	https://www.repubblica.it/salute/ricerca/2015/04/21/news/vaccini_e_autismo_un_nuovo_studio_smentisce_correlazione-112493858/					17	pos	pos	neg	pos	pos	neg	pos
	18	https://www.galileonet.it/legame-vaccino-mpr-autismo/	https://www.ilpost.it/2014/03/24/vaccini-autismo/	https://www.bufale.net/autismo-vaccini	https://www.ilpost.it/2014/03/24/vaccini-autismo/	http://www.mednat.org/vaccini/autismo_conferme.htm	https://www.repubblica.it/salute/ricerca/2015/04/21/news/vaccini_e_autismo_un_nuovo_studio_smentisce_correlazione-112493858/	www.mednat.org/vaccini/autismo.htm					18	pos	pos	pos	pos	neg	pos	neg
	19	https://www.angsalazio.org/faqs/vaccini-causano-lautismo/	https://www.disinformazione.it/vaccinieautismo.htm	https://www.issalute.it/.../i-vaccini/250-i-vaccini-fanno-venire-l-autismo	https://www.disinformazione.it/vaccinieautismo.htm	https://www.stateofmind.it/tag/autismo/	www.mednat.org/vaccini/autismo.htm	www.salute.gov.it/portale/news/p3_2_1_1_1.jsp?menu=notizie&id=1524					19	pos	neg	pos	neg	pos	neg	pos
	20	https://www.susannaesposito.it/vaccini-autismo-realta-falsi-miti/	https://www.portale-autismo.it/vaccini-e-autismo/	https://www.ohga.it/le-fake-news-sui-vaccini-dallautismo-al-sovraccarico-immunologico-tutte-le-bufale/	https://www.portale-autismo.it/vaccini-e-autismo/	http://www.salute.gov.it/portale/news/p3_2_1_1_1.jsp?menu=notizie&id=1524	www.salute.gov.it/portale/news/p3_2_1_1_1.jsp?menu=notizie&id=1524	https://www.issalute.it/.../i-vaccini/250-i-vaccini-fanno-venire-l-autismo					20	pos	pos	pos	pos	pos	pos	pos
	21	https://www.gruppomacro.com/blog/cure-alternative/autismo-vaccini-bambini-danni	https://www.susannaesposito.it/vaccini-autismo-realta-falsi-miti/	www.comilva.org/autismo-e-vaccinazioni	https://www.ohga.it/le-fake-news-sui-vaccini-dallautismo-al-sovraccarico-immunologico-tutte-le-bufale/	https://it.wikipedia.org/wiki/Vaccino	https://www.issalute.it/.../i-vaccini/250-i-vaccini-fanno-venire-l-autismo	https://www.facebook.com/autismovaccini					21	neg	pos	neg	pos	pos	pos	neg
	22	http://www.polesine24.it/24/2019/02/25/news/vaccino-e-autismo-parola-al-giudice-37067/	https://www.ohga.it/le-fake-news-sui-vaccini-dallautismo-al-sovraccarico-immunologico-tutte-le-bufale/	https://www.wired.it/scienza/medicina/2017/08/25/vaccini-autismo-coperture	https://www.susannaesposito.it/vaccini-autismo-realta-falsi-miti/	https://www.repubblica.it/salute/ricerca/2015/04/21/news/vaccini_e_autismo_un_nuovo_studio_smentisce_correlazione-112493858/	https://www.facebook.com/autismovaccini	https://www.stateofmind.it/tag/autismo					22	neg	pos	pos	pos	pos	neg	neutral
	23	http://www.oltrelabirinto.it/news.aspx?idC=977	https://www.repubblica.it/salute/ricerca/2015/04/21/news/vaccini_e_autismo_un_nuovo_studio_smentisce_correlazione-112493858/	https://aulascienze.scuola.zanichelli.it/.../03/vaccini-e-autismo-finalmente-la-sentenza	https://www.repubblica.it/salute/ricerca/2015/04/21/news/vaccini_e_autismo_un_nuovo_studio_smentisce_correlazione-112493858/	http://www.today.it/cronaca/vaccini-autismo-bufala.html	https://www.stateofmind.it/tag/autismo	https://www.scienzaeconoscenza.it/blog/critica-sistema-sanitario-industria-farmaceutica/vaccini-autismo-montagnier					23	pos	pos	pos	pos	pos	neutral	neg
	24	https://www.medicalfacts.it/2019/03/06/i-vaccini-non-causano-autismo-e-lennesimo-studio-lo-dimostra/	http://digrazia-lescienze.blogautore.espresso.repubblica.it/2014/11/29/il-vaccino-causa-lautismo-cosi-e-deciso/	https://www.nostrofiglio.it/news/vaccini-e-autismo-la-madre-di-tutte-le-bufale-compie-20-anni-cosa-sappiamo-oggi	digrazia-lescienze.blogautore.espresso.repubblica.it/2014/11/29/il-vaccino-causa-lautismo-cosi-e-deciso/	https://www.facebook.com/autismovaccini	https://www.scienzaeconoscenza.it/blog/critica-sistema-sanitario-industria-farmaceutica/vaccini-autismo-montagnier	https://www.disinformazione.it/vaccinieautismo.htm					24	pos	neutral	pos	pos	neg	neg	neg
	25	https://www.ilpost.it/2019/03/05/autismo-vaccino-mpr/	https://www.gruppomacro.com/blog/cure-alternative/autismo-vaccini-bambini-danni	vivalamamma.tgcom24.it/2012/07/i-vaccini-possono-davvero-provocare-lautismo	https://www.gruppomacro.com/blog/cure-alternative/autismo-vaccini-bambini-danni	https://www.portale-autismo.it/vaccini-e-autismo/	https://www.disinformazione.it/vaccinieautismo.htm	www.today.it/cronaca/vaccini-autismo-bufala.html					25	pos	neg	neg	neg	pos	neg	pos
	26	https://www.nostrofiglio.it/neonato/vaccinazioni-ai-bambini/vaccini-e-autismo-un-nuovo-studio-smonta-definitivamente-la-bufala	http://www.salute.gov.it/portale/news/p3_2_1_1_1.jsp?menu=notizie&id=1524	https://www.portale-autismo.it/autismo-vaccini-dove-nasce-la-leggenda	https://www.focus.it/scienza/salute/vaccini-e-autismo-un-nuovo-caso-di-pseudoscienza	https://www.disinformazione.it/vaccinieautismo.htm	www.today.it/cronaca/vaccini-autismo-bufala.html	https://www.pianetamamma.it/il-bambino/malattie/vaccini-autismo-sentenza-tribunale.html					26	pos	pos	pos	pos	neg	pos	pos
	27	http://angsa.it/tag/vaccini/	https://www.focus.it/scienza/salute/vaccini-e-autismo-un-nuovo-caso-di-pseudoscienza	https://www.focus.it/scienza/salute/vaccino-mpr-autismo-studio-nessun-legame	www.salute.gov.it/portale/news/p3_2_1_1_1.jsp?menu=notizie&id=1524	http://www.mednat.org/vaccini/autismo.htm	https://www.pianetamamma.it/il-bambino/malattie/vaccini-autismo-sentenza-tribunale.html	https://www.portale-autismo.it/vaccini-e-autismo					27	pos	pos	pos	pos	neg	pos	pos
	28	https://www.macrolibrarsi.it/speciali/autismo-e-vaccini.php	https://www.pianetamamma.it/il-bambino/malattie/vaccini-autismo-sentenza-tribunale.html	https://tg24.sky.it/salute-e-benessere/2018/02/22/prima-bufala-vaccini-autismo-storia	https://www.pianetamamma.it/il-bambino/malattie/vaccini-autismo-sentenza-tribunale.html	https://www.pianetamamma.it/il-bambino/malattie/vaccini-autismo-sentenza-tribunale.html	https://www.nostrofiglio.it/neonato/vaccinazioni-ai-bambini/vaccini-e-autismo-un-nuovo-studio-smonta-definitivamente-la-bufala	www.infoautismo.it/radioautismo.org/watch.php?vid=b04fce79d					28	neg	pos	pos	pos	pos	pos	neg
	29	http://www.today.it/politica/vaccini-autismo-cassazione-ultime-notizie.html	https://www.intopic.it/salute/autismo/	bambini.corriere.it/2014/11/03/vaccinazioni-e-autismo-quale-legame	https://it-it.facebook.com/autismovaccini/	https://www.scienzaeconoscenza.it/blog/critica-sistema-sanitario-industria-farmaceutica/vaccini-autismo-montagnier	www.infoautismo.it/radioautismo.org/watch.php?vid=b04fce79d	https://it.wikipedia.org/wiki/Vaccino					29	neutral	neg	pos	neg	neg	neg	pos
	30	https://www.donnamoderna.com/news/societa/vaccini-autismo-vaxxed-antivaccino	https://it-it.facebook.com/autismovaccini/	https://it.wikipedia.org/wiki/Cause_dell'autismo	www.fondazione-autismo.it/approfondimenti-su-autismo-e-vaccini/	https://www.ohga.it/le-fake-news-sui-vaccini-dallautismo-al-sovraccarico-immunologico-tutte-le-bufale/	https://www.portale-autismo.it/vaccini-e-autismo	https://www.ohga.it/le-fake-news-sui-vaccini-dallautismo-al-sovraccarico-immunologico-tutte-le-bufale/					30	pos	pos	pos	pos	pos	pos	pos
			SPANISH - URL												SPANISH-STANCE
	rank	Google.es	Yahoo	Bing	Duckduck	Ecosia	Qwant						Rank	Google.es	Yahoo	Bing	Duckduck	Ecosia	Qwant
	1	kidshealth.org/es/parents/autism-studies-esp.html	espanol.babycenter.com/a4500106/vacunas-y-autismo-distinci%C3%B3n-entre-la-realidad-y-la-ficci%C3%B3n	espanol.babycenter.com/a4500106/vacunas-y-autismo-distinci%C3%B3n-entre-la-realidad-y-la-ficci%C3%B3n	espanol.babycenter.com/a4500106/vacunas-y-autismo-distinción-entre-la-realidad-y-la-ficción	espanol.babycenter.com/a4500106/vacunas-y-autismo-distinción-entre-la-realidad...	espanol.babycenter.com/a4500106/vacunas-y-autismo-distinción-entre-la-realidad...						1	pro	pro	pro	pro	pro	pro
	2	autismo.org.es/actualidad/articulo/las-vacunas-no-causan-autismo	vacunas.org/vacunas-autismo/	vacunas.org/vacunas-autismo/	vacunas.org/vacunas-autismo/	dsalud.com/reportaje/confirman-la-relacion-vacunas-autismo	dsalud.com/reportaje/confirman-la-relacion-vacunas-autismo						2	pro	pro	pro	pro	anti	pro
	3	elpais.com/elpais/2019/03/05/mamas_papas/1551783023_370147.html	autismoconsejospracticos.com/vacunas-autismo-tea/	autismoconsejospracticos.com/vacunas-autismo-tea/	autismoconsejospracticos.com/vacunas-autismo-tea/	autismo.org.es/actualidad/articulo/las-vacunas-no-causan-autismo	autismo.org.es/actualidad/articulo/las-vacunas-no-causan-autismo						3	pro	neutr	neutr	neutr	pro	pro
	4	abc.es/sociedad/abci-origen-bulo-vincula-autismo-vacunas-201706122114_noticia.html	autismo.org.es/actualidad/articulo/las-vacunas-no-causan-autismo	autismo.org.es/actualidad/articulo/las-vacunas-no-causan-autismo	autismo.org.es/actualidad/articulo/las-vacunas-no-causan-autismo	autismoconsejospracticos.com/vacunas-autismo-trump	autismoconsejospracticos.com/vacunas-autismo-trump						4	pro	pro	pro	pro	anti	anti
	5	vacunasaep.org/familias/pregunta-al-cav/desconfianza-en-las-vacunas/triple-virica-seguridad-y-autismo	jotdown.es/2019/02/vacunas-y-autismo/	jotdown.es/2019/02/vacunas-y-autismo/	jotdown.es/2019/02/vacunas-y-autismo/	autismoava.org/vacunas/...de-usa-ha-reconocido-un-caso-de-vacuna-autismo-en-el-tribun	autismoava.org/vacunas/...de-usa-ha-reconocido-un-caso-de-vacuna-autismo-en-el-tribun						5	pro	pro	pro	pro	anti	anti
	6	bebesymas.com/salud-infantil/causa-autismo-la-vacuna-triple-virica-un-estudio-de-ninos-con-hermanos-con-y-sin-autismo-da-respuesta	dsalud.com/reportaje/confirman-la-relacion-vacunas-autismo/	dsalud.com/reportaje/confirman-la-relacion-vacunas-autismo/	dsalud.com/reportaje/confirman-la-relacion-vacunas-autismo/	kidshealth.org/es/parents/autism-studies-esp.html	kidshealth.org/es/parents/autism-studies-esp.html						6	pro	neutral	neutral	neutral	pro	pro
	7	vacunas.org/la-vacuna-triple-virica-no-causa-autismo/	bebesymas.com/salud-infantil/causa-autismo-la-vacuna-triple-virica-un-estudio-de-ninos-con-hermanos-con-y-sin-autismo-da-respuesta	bebesymas.com/salud-infantil/causa-autismo-la-vacuna-triple-virica-un-estudio-de-ninos-con-hermanos-con-y-sin-autismo-da-respuesta	bebesymas.com/salud-infantil/causa-autismo-la-vacuna-triple-virica-un-estudio-de-ninos-con-hermanos-con-y-sin-autismo-da-respuesta	jotdown.es/2019/02/vacunas-y-autismo	bebesymas.com/salud-infantil/causa-autismo-la-vacuna-triple-virica-un...						7	pro	pro	pro	pro	pro	pro
	8	dsalud.com/reportaje/confirman-la-relacion-vacunas-autismo/	autismoconsejospracticos.com/vacunas-autismo-trump/	autismoconsejospracticos.com/vacunas-autismo-trump/	autismoconsejospracticos.com/vacunas-autismo-trump/	bebesymas.com/salud-infantil/causa-autismo-la-vacuna-triple-virica-un...	vacunas.org/vacunas-autismo						8	anti	neutr	anti	anti	pro	pro
	9	clustersalud.americaeconomia.com/tiinnovacion/confirmado-no-hay-relacion-entre-vacunas-y-autismo	autismoava.org/vacunas/noticias-y-articulos/el-gobierno-de-usa-ha-reconocido-un-caso-de-vacuna-autismo-en-el-tribun	autismoava.org/vacunas/noticias-y-articulos/el-gobierno-de-usa-ha-reconocido-un-caso-de-vacuna-autismo-en-el-tribun	autismoava.org/vacunas/noticias-y-articulos/el-gobierno-de-usa-ha-reconocido-un-caso-de-vacuna-autismo-en-el-tribun	vacunas.org/vacunas-autismo	jotdown.es/2019/02/vacunas-y-autismo						9	pro	anti	anti	anti	pro	neutr
	10	jotdown.es/2019/02/vacunas-y-autismo/	kidshealth.org/es/parents/autism-studies-esp.html	clinica-aeromedica.net/ciencia/vacunas-y-autismo/	kidshealth.org/es/parents/autism-studies-esp.html	autismoconsejospracticos.com/vacunas-autismo-tea	autismoconsejospracticos.com/vacunas-autismo-tea						10	pro	pro	anti	pro	neutr	neutr
	11	clinica-aeromedica.net/ciencia/vacunas-y-autismo/	clinica-aeromedica.net/ciencia/vacunas-y-autismo/	abc.es/sociedad/abci-origen-bulo-vincula-autismo-vacunas-201706122114_noticia.html	clinica-aeromedica.net/ciencia/vacunas-y-autismo/	abc.es/sociedad/abci-origen-bulo-vincula-autismo-vacunas-201706122114...	abc.es/sociedad/abci-origen-bulo-vincula-autismo-vacunas-201706122114...						11	anti	anti	pro	anti	pro	pro
	12	autismomadrid.es/lateral/lo-que-necesitas-saber-sobre-las-vacunas-y-el-autismo/	abc.es/sociedad/abci-origen-bulo-vincula-autismo-vacunas-201706122114_noticia.html	lamenteesmaravillosa.com/las-vacunas-autismo-estan-relacionados/	abc.es/sociedad/abci-origen-bulo-vincula-autismo-vacunas-201706122114_noticia.html	nytimes.com/es/2019/03/07/vacunas-autismo-sarampion-antivacunas	nytimes.com/es/2019/03/07/vacunas-autismo-sarampion-antivacunas						12	pro	pro	pro	pro	pro	pro
	13	healthychildren.org/Spanish/safety-prevention/immunizations/Paginas/vaccine-studies-examine-the-evidence.aspx	nytimes.com/es/2019/03/07/vacunas-autismo-sarampion-antivacunas/	cienciaysaludnatural.com/autismo-causado-por-vacunas-un-caso-incuestionable/	nytimes.com/es/2019/03/07/vacunas-autismo-sarampion-antivacunas/	clinica-aeromedica.net/ciencia/vacunas-y-autismo	clinica-aeromedica.net/ciencia/vacunas-y-autismo						13	pro	pro	anti	pro	anti	anti
	14	neurologia.com/articulo/2009761	cienciaysaludnatural.com/autismo-causado-por-vacunas-un-caso-incuestionable/	vix.com/es/btg/curiosidades/4571/las-vacunas-provocan-autismo	cienciaysaludnatural.com/autismo-causado-por-vacunas-un-caso-incuestionable/	healthychildren.org/Spanish/safety-prevention/immunizations/Paginas/...	healthychildren.org/Spanish/safety-prevention/immunizations/Paginas/...						14	pro	anti	pro	anti	pro	pro
	15	eldiario.es/zonacritica/Vacunas-mentiras-extraordinarias-derroches-extraordinarios_6_875322494.html	vacunas.org/las-vacunas-no-causan-autismo/	nytimes.com/es/2019/03/07/vacunas-autismo-sarampion-antivacunas/	vacunas.org/las-vacunas-no-causan-autismo/	cienciaysaludnatural.com/autismo-causado-por-vacunas-un-caso-incuestionable	cienciaysaludnatural.com/autismo-causado-por-vacunas-un-caso-incuestionable						15	pro	pro	pro	pro	anti	anti
	16	cigna.com/individuals-families/health-wellness/hw-en-espanol/temas-de-salud/el-autismo-y-las-vacunas-ue4907	vix.com/es/btg/curiosidades/4571/las-vacunas-provocan-autismo	psyciencia.com/relacion-vacunas-autismo/	vix.com/es/btg/curiosidades/4571/las-vacunas-provocan-autismo	vacunas.org/las-vacunas-no-causan-autismo	vacunas.org/las-vacunas-no-causan-autismo						16	pro	pro	pro	pro	pro	pro
	17	scielo.isciii.es/pdf/gs/v26n4/especial1.pdf	hipertextual.com/2017/06/levantate-cardenas-vacunas-autismo	hipertextual.com/2017/06/levantate-cardenas-vacunas-autismo	hipertextual.com/2017/06/levantate-cardenas-vacunas-autismo	vix.com/es/btg/curiosidades/4571/las-vacunas-provocan-autismo	vix.com/es/btg/curiosidades/4571/las-vacunas-provocan-autismo						17	pro	pro	pro	pro	pro	pro
	18	intramed.net/87039	psyciencia.com/relacion-vacunas-autismo/	vacunas.org/las-vacunas-no-causan-autismo/	healthychildren.org/Spanish/safety-prevention/immunizations/Paginas/Vaccine-Studies-Examine-the-Evidence.aspx	hipertextual.com/2017/06/levantate-cardenas-vacunas-autismo	hipertextual.com/2017/06/levantate-cardenas-vacunas-autismo						18	pro	pro	pro	pro	pro	pro
	19	scielo.sld.cu/pdf/vac/v13n2/vac01204.pdf	healthychildren.org/Spanish/safety-prevention/immunizations/Paginas/Vaccine-Studies-Examine-the-Evidence.aspx	medicadoo.es/2017/09/05/vacunas-y-autismo-historia-de-una-peligrosa/	psyciencia.com/relacion-vacunas-autismo/	psyciencia.com/relacion-vacunas-autismo	psyciencia.com/relacion-vacunas-autismo						19	pro	pro	pro	pro	pro	pro
	20	nytimes.com/es/2019/03/07/vacunas-autismo-sarampion-antivacunas/	blogs.20minutos.es/madrereciente/2017/06/07/las-vacunas-no-causan-autismo-javier-cardenas-las-vacunas-salvan-vidas-tenemos-la-responsabilidad-transmitirlo-asi-desde-los-medios/	boticariagarcia.com/video-vacunas-autismo-876	blogs.20minutos.es/madrereciente/2017/06/07/las-vacunas-no-causan-autismo-javier-cardenas-las-vacunas-salvan-vidas-tenemos-la-responsabilidad-transmitirlo-asi-desde-los-medios/	elperiodico.com/es/ciencia/20190620/inhabilitada-pediatra-vacunas-autismo...	elperiodico.com/es/ciencia/20190620/inhabilitada-pediatra-vacunas-autismo...						20	pro	pro	pro	pro	pro	pro
	21	actasanitaria.com/las-vacunas-en-su-laberinto-de-la-ignorancia-al-autismo/	eldiario.es/zonacritica/Vacunas-mentiras-extraordinarias-derroches-extraordinarios_6_875322494.html	dsalud.com/reportaje/las-vacunas-pueden-causar-autismo/	eldiario.es/zonacritica/Vacunas-mentiras-extraordinarias-derroches-extraordinarios_6_875322494.html	blogs.20minutos.es/madrereciente/2017/06/07/las-vacunas-no-causan-autismo...	blogs.20minutos.es/madrereciente/2017/06/07/las-vacunas-no-causan-autismo...						21	pro	pro	anti	pro	pro	pro
	22	lavozdegalicia.es/noticia/sociedad/2019/03/05/vacuna-triple-virica-produce-autismo-nuevo-estudio-confirma/00031551776285666471533.htm	lamenteesmaravillosa.com/las-vacunas-autismo-estan-relacionados/	blogs.20minutos.es/madrereciente/2017/06/07/las-vacunas-no-causan-autismo-javier-cardenas-las-vacunas-salvan-vidas-tenemos-la-responsabilidad-transmitirlo-asi-desde-los-medios/	lamenteesmaravillosa.com/las-vacunas-autismo-estan-relacionados/	eldiario.es/zonacritica/Vacunas-mentiras-extraordinarias-derroches-extraor...	eldiario.es/zonacritica/Vacunas-mentiras-extraordinarias-derroches-extraor...						22	pro	pro	pro	pro	pro	pro
	23	redaccionmedica.com/autonomias/madrid/madrid-inhabilita-a-una-pediatra-por-vincular-las-vacunas-con-el-autismo--3137	dsalud.com/reportaje/las-vacunas-pueden-causar-autismo/	elperiodico.com/es/ciencia/20190620/inhabilitada-pediatra-vacunas-autismo-7514999	elperiodico.com/es/ciencia/20190620/inhabilitada-pediatra-vacunas-autismo-7514999	lamenteesmaravillosa.com/las-vacunas-autismo-estan-relacionados	lamenteesmaravillosa.com/las-vacunas-autismo-estan-relacionados						23	pro	anti	pro	pro	pro	pro
	24	elespanol.com/ciencia/salud/20190621/inhabilitada-pediatra-madrid-defender-vacunas-causan-autismo/407710319_0.html	elperiodico.com/es/ciencia/20190620/inhabilitada-pediatra-vacunas-autismo-7514999	eldiario.es/zonacritica/Vacunas-mentiras-extraordinarias-derroches-extraordinarios_6_875322494.html	boticariagarcia.com/video-vacunas-autismo-876	eldiario.es/sociedad/pediatra-Madrid-inhabilitada-difundir-vacunas_0...	eldiario.es/sociedad/pediatra-Madrid-inhabilitada-difundir-vacunas_0...						24	pro	pro	pro	pro	pro	pro
	25	ww.autismoava.org/vacunas/noticias-y-articulos/el-gobierno-de-usa-ha-reconocido-un-caso-de-vacuna-autismo-en-el-tribun	autismodiario.org/2015/07/21/conversando-sobre-vacunas-y-trastornos-del-espectro-del-autismo/	autismodiario.org/2015/07/21/conversando-sobre-vacunas-y-trastornos-del-espectro-del-autismo/	dsalud.com/reportaje/las-vacunas-pueden-causar-autismo/	boticariagarcia.com/video-vacunas-autismo-876	boticariagarcia.com/video-vacunas-autismo-876						25	anti	pro	pro	anti	pro	pro
	26	elmundo.es/madrid/2019/06/21/5d0c7c5121efa08e138b45d2.html	boticariagarcia.com/video-vacunas-autismo-876	maldita.es/malditaciencia/fetos-adn-vacunas-y-autismo-una-vuelta-de-tuerca-la-corriente-antivacunas-que-tampoco-tiene-evidencias/	autismodiario.org/2015/07/21/conversando-sobre-vacunas-y-trastornos-del-espectro-del-autismo/	elperiodico.com/.../judios-ultraortodoxos-brooklyn-vacunas-autismo-7399886	elperiodico.com/.../judios-ultraortodoxos-brooklyn-vacunas-autismo-7399886						26	pro	pro	pro	pro	pro	pro
	27	elespectador.com/noticias/salud/masivo-estudio-confirma-que-no-hay-relacion-entre-vacunas-y-autismo-articulo-843243	eldiario.es/sociedad/pediatra-Madrid-inhabilitada-difundir-vacunas_0_912009759.html	saludsinbulos.com/vacunas/bulo-vacunas-autismo/	eldiario.es/sociedad/pediatra-Madrid-inhabilitada-difundir-vacunas_0_912009759.html	autismodiario.org/2015/07/21/conversando-sobre-vacunas-y-trastornos-del...	autismodiario.org/2015/07/21/conversando-sobre-vacunas-y-trastornos-del...						27	pro	pro	pro	pro	pro	pro
	28	elconfidencial.com/tecnologia/ciencia/2018-03-26/autismo-vacunacion-polemica-estudio_1541349/	medicadoo.es/2017/09/05/vacunas-y-autismo-historia-de-una-peligrosa/	bekiapadres.com/articulos/provocan-vacunas-autismo/	medicadoo.es/2017/09/05/vacunas-y-autismo-historia-de-una-peligrosa/	dsalud.com/reportaje/las-vacunas-pueden-causar-autismo	dsalud.com/reportaje/las-vacunas-pueden-causar-autismo						28	pro	pro	pro	pro	anti	anti
	29	jralonso.es/2010/01/13/la-vacuna-triple-virica-y-el-autismo/	elperiodico.com/es/internacional/20190410/judios-ultraortodoxos-brooklyn-vacunas-autismo-7399886	elconfidencial.com/espana/2019-06-20/inhabilitada-pediatra-madrid-vincular-vacunas-autismo_2082115/	saludsinbulos.com/vacunas/bulo-vacunas-autismo/	maldita.es/malditaciencia/fetos-adn-vacunas-y-autismo-una-vuelta-de-tuerca-la...	maldita.es/malditaciencia/fetos-adn-vacunas-y-autismo-una-vuelta-de-tuerca-la...						29	pro	pro	pro	pro	pro	pro
	30	actualidad.rt.com/actualidad/308847-vacunas-autismo-antivacunas-distorsionar-dosis-ciencia	maldita.es/malditaciencia/fetos-adn-vacunas-y-autismo-una-vuelta-de-tuerca-la-corriente-antivacunas-que-tampoco-tiene-evidencias/	sebbm.es/web/es/divulgacion/rincon-profesor-ciencias/articulos-divulgacion-cientifica/3460-las-vacunas-salvan-vidas-y-no-producen-autismo	bekiapadres.com/articulos/provocan-vacunas-autismo/	sebbm.es/.../3460-las-vacunas-salvan-vidas-y-no-producen-autismo	sebbm.es/.../3460-las-vacunas-salvan-vidas-y-no-producen-autismo						30	pro	pro	pro	pro	pro	pro
														FRENCH-STANCE
		FRENCH URL
		Google.fr	Yahoo	Bing	Duckduck	Ecosia	Mojeek	Qwant					Rank	Google.fr	Yahoo	Bing	Duckduck	Ecosia	Mojeek	Qwant
	1	https://www.pharmacie.be/actualites/vaccin-rr0-pas-de-lien-avec-lautisme	https://www.francetvinfo.fr/sante/maladie/vaccins-et-autisme-l-histoire-d-une-fraude-scientifique_2299629.html	https://www.passeportsante.net/fr/Actualites/Dossiers/ArticleComplementaire.aspx?doc=vaccination_mmr_thimerosal_do#	https://fr.wikipedia.org/wiki/Controverse_sur_le_r%C3%B4le_de_la_vaccination_dans_l%27autisme	https://www.francetvinfo.fr/sante/maladie/vaccins-et-autisme-l-histoire-d-une-fraude-scientifique_2299629.html	www.alterinfo.net/Les-vaccins-ont-provoque-l-autisme-chez-mon-petit-garcon_a124626.html	francetvinfo.fr/sante/maladie/vaccins-et-autisme-l-histoire-d-une-fraude...					1	pos	pos	neutr	neutr	pos	neg	pos
	2	https://www.who.int/vaccine_safety/committee/topics/mmr/mmr_autism/fr/	https://www.passeportsante.net/fr/Actualites/Dossiers/ArticleComplementaire.aspx?doc=vaccination_mmr_thimerosal_do	https://www.francetvinfo.fr/sante/maladie/vaccins-et-autisme-l-histoire-d-une-fraude-scientifique_2299629.html	https://www.francetvinfo.fr/sante/maladie/vaccins-et-autisme-l-histoire-d-une-fraude-scientifique_2299629.html	https://fr.wikipedia.org/wiki/Controverse_sur_le_r%C3%B4le_de_la_vaccination_dans_l%27autisme	https://en.wikipedia.org/wiki/MMR_vaccine_and_autism	fr.wikipedia.org/wiki/Controverse_sur_le_rôle_de_la_vaccination_dans_l'autisme					2	pos	neutr	pos	pos	neutr	pos	neutr
	3	https://fr.wikipedia.org/wiki/Controverse_sur_le_r%C3%B4le_de_la_vaccination_dans_l%27autisme	https://fr.wikipedia.org/wiki/Controverse_sur_le_r%C3%B4le_de_la_vaccination_dans_l%27autisme	https://fr.wikipedia.org/wiki/Controverse_sur_le_r%C3%B4le_de_la_vaccination_dans_l%27autisme	https://www.participate-autisme.be/go/fr/comprendre-l-autisme/comprendre-le-diagnostic/les-causes-de-l-autisme/autres-causes-de-l-autisme/le-vaccin-contre-la-rougeole.cfm	http://initiativecitoyenne.be/article-22-etudes-scientifiques-montrent-que-les-vaccins-peuvent-causer-l-autisme-123110741.html	https://www.sciencesetavenir.fr/sante/non-le-vaccin-ror-n-est-pas-lie-a-l-autisme_131969	initiativecitoyenne.be/...montrent-que-les-vaccins-peuvent-causer-l-autisme-123110741.html					3	neutr	neutr	neutr	pos	neg	pos	neg
	4	https://www.participate-autisme.be/go/fr/comprendre-l-autisme/comprendre-le-diagnostic/les-causes-de-l-autisme/autres-causes-de-l-autisme/le-vaccin-contre-la-rougeole.cfm	http://initiativecitoyenne.be/article-22-etudes-scientifiques-montrent-que-les-vaccins-peuvent-causer-l-autisme-123110741.html	http://initiativecitoyenne.be/article-22-etudes-scientifiques-montrent-que-les-vaccins-peuvent-causer-l-autisme-123110741.html	https://interetpourtous.com/2017/01/13/cnn-lautisme-est-bien-cause-par-les-vaccins/	https://www.passeportsante.net/fr/Actualites/Dossiers/ArticleComplementaire.aspx?doc=vaccination_mmr_thimerosal_do	www.thierrysouccar.com/blog/vaccins-et-autisme-les-faits-simposent	passeportsante.net/fr/Actualites/Dossiers/ArticleComplementaire.aspx?doc=...					4	pos	neg	neg	neg	neutr	neg	neutr
	5	http://sante.lefigaro.fr/article/une-vaste-etude-dement-une-nouvelle-fois-le-lien-entre-vaccin-et-autisme/	https://professionnels.vaccination-info-service.fr/Aspects-sociologiques/Controverses/Autisme	https://professionnels.vaccination-info-service.fr/Aspects-sociologiques/Controverses/Autisme	https://www.passeportsante.net/fr/Actualites/Dossiers/ArticleComplementaire.aspx?doc=vaccination_mmr_thimerosal_do	https://interetpourtous.com/2017/01/13/cnn-lautisme-est-bien-cause-par-les-vaccins/	https://informations.handicap.fr/a-vaccin-ror-autisme-aucun-lien-11632.php	interetpourtous.com/2017/01/13/cnn-lautisme-est-bien-cause-par-les-vaccins					5	pos	pos	pos	neutr	neg	pos	neg
	6	https://www.futura-sciences.com/sante/actualites/autisme-vaccins-autisme-aucun-lien-selon-plus-grande-etude-sujet-27221/	http://www.charlatans.info/vaccin-autisme.php	https://www.participate-autisme.be/go/fr/comprendre-l-autisme/comprendre-le-diagnostic/les-causes-de-l-autisme/autres-causes-de-l-autisme/le-vaccin-contre-la-rougeole.cfm	https://michel.delorgeril.info/ethique-et-transparence/vaccins-et-autisme-les-faits-parfois-simposent/	https://www.participate-autisme.be/go/fr/comprendre-l-autisme/comprendre-le-diagnostic/les-causes-de-l-autisme/autres-causes-de-l-autisme/le-vaccin-contre-la-rougeole.cfm	sciences.amatheurs.fr/index.php?page=autisme&lang=fr	https://www.participate-autisme.be/go/fr/comprendre-l-autisme/comprendre-le-diagnostic/les-causes-de-l-autisme/autres-causes-de-l-autisme/le-vaccin-contre-la-rougeole.cfm-autisme.be/.../le-vaccin-contre-la-rougeole.cfm					6	pos	pos	pos	neg	pos	pos	pos
	7	https://www.rtbf.be/info/societe/detail_selon-une-nouvelle-etude-le-vaccin-contre-la-rougeole-ne-provoque-pas-l-autisme?id=10164207	https://www.lexpress.fr/actualite/societe/sante/autisme-le-danger-n-est-pas-le-vaccin-mais-l-absence-de-vaccination_1930221.html	http://www.charlatans.info/vaccin-autisme.php	https://www.sciencepresse.qc.ca/blogue/2013/11/13/lhistoire-trouble-vaccin-rougeole-lautisme	http://www.astrosurf.com/luxorion/autisme-ror.htm	www.sunsimiao.org/article55.html	www.astrosurf.com/luxorion/autisme-ror.htm					7	pos	pos	pos	pos	neutr	neg	neutr
	8	https://www.lesoir.be/210522/article/2019-03-05/une-grande-etude-confirme-une-nouvelle-fois-que-le-vaccin-ror-ne-cause-pas	http://www.astrosurf.com/luxorion/autisme-ror.htm	https://www.lexpress.fr/actualite/societe/sante/autisme-le-danger-n-est-pas-le-vaccin-mais-l-absence-de-vaccination_1930221.html	https://lactualite.com/sante-et-science/vaccins-et-autisme-croire-ou-savoir/	http://initiativecitoyenne.be/2015/08/le-vaccin-ror-a-plonge-mon-enfant-dans-l-autisme.html	https://aimsib.org/2018/03/24/vaccins-et-autisme-un-lien-statistique-desormais-demontre/	initiativecitoyenne.be/2015/08/le-vaccin-ror-a-plonge-mon-enfant-dans-l-autisme.html					8	pos	neutr	pos	pos	neg	neg	neg
	9	https://lactualite.com/sante-et-science/vaccins-et-autisme-croire-ou-savoir/	https://interetpourtous.com/2017/01/13/cnn-lautisme-est-bien-cause-par-les-vaccins/	http://www.astrosurf.com/luxorion/autisme-ror.htm	https://professionnels.vaccination-info-service.fr/Aspects-sociologiques/Controverses/Autisme	https://professionnels.vaccination-info-service.fr/Aspects-sociologiques/Controverses/Autisme	www.amessi.org/Autisme-vaccin-on-essaie-de-ridiculiser-les-faits	professionnels.vaccination-info-service.fr/.../Controverses/Autisme					9	pos	neg	neutr	pos	pos	neg	pos
	10	https://www.nouvelobs.com/sante/20190306.OBS1246/une-etude-sur-650-000-enfants-confirme-de-nouveau-que-le-vaccin-ror-ne-cause-pas-l-autisme.html	https://www.marianne.net/societe/vaccin-et-autisme-n-oublions-pas-le-role-preponderant-de-l-heredite	https://interetpourtous.com/2017/01/13/cnn-lautisme-est-bien-cause-par-les-vaccins/	https://www.allodocteurs.fr/se-soigner/vaccins/vaccin-de-la-rougeole-et-autisme-les-sequelles-d-039-une-fraude_15701.html	https://www.lexpress.fr/actualite/societe/sante/autisme-le-danger-n-est-pas-le-vaccin-mais-l-absence-de-vaccination_1930221.html	www.psychostrategy.net/2017/07/vaccinations-pediatriques-et-autisme-la-justice-francaise-va-bientot-devoir-trancher.html	lexpress.fr/actualite/societe/sante/autisme-le-danger-n-est-pas-le-vaccin...					10	pos	pos	neg	pos	pos	neutr	pos
	11	https://www.sciencesetavenir.fr/sante/non-le-vaccin-ror-n-est-pas-lie-a-l-autisme_131969	https://informations.handicap.fr/a-vaccin-autisme-justice-10057.php	https://aimsib.org/2018/03/24/vaccins-et-autisme-un-lien-statistique-desormais-demontre/	https://www.marianne.net/societe/vaccin-et-autisme-n-oublions-pas-le-role-preponderant-de-l-heredite	http://www.charlatans.info/vaccin-autisme.php	www.jepeuxpasjaivaccin.fr/vaccin-hepatite-b-autisme/	www.charlatans.info/vaccin-autisme.php					11	pos	neutr	neg	pos	pos	neutr	pos
	12	https://www.sciencepresse.qc.ca/actualite/2019/03/11/vaccin-autisme-etait-contraire	https://www.lemonde.fr/les-decodeurs/article/2016/09/16/idee-recue-n-2-les-vaccins-peuvent-causer-l-autisme_4998678_4355770.html	https://lactualite.com/sante-et-science/vaccins-et-autisme-croire-ou-savoir/	https://www.futura-sciences.com/sante/actualites/autisme-vaccins-autisme-aucun-lien...	https://www.marianne.net/societe/vaccin-et-autisme-n-oublions-pas-le-role-preponderant-de-l-heredite	https://www.healthandlovepage.com/vaccines-cancer-autism/	marianne.net/societe/vaccin-et-autisme-n-oublions-pas-le-role-preponderant...					12	pos	pos	pos	pos	pos	neg	pos
	13	https://factuel.afp.com/non-des-tribunaux-americains-nont-pas-confirme-que-le-vaccin-contre-la-rougeole-cause-lautisme	https://michel.delorgeril.info/ethique-et-transparence/vaccins-et-autisme-les-faits-parfois-simposent/	https://www.marianne.net/societe/vaccin-et-autisme-n-oublions-pas-le-role-preponderant-de-l-heredite	https://naitreetgrandir.com/fr/nouvelles/2014/05/28/vaccination-autisme-fin-controverse	https://michel.delorgeril.info/ethique-et-transparence/vaccins-et-autisme-les-faits-parfois-simposent/	autismecornouaille.fr/autisme-et-vaccination-ce-quil-faut-savoir/	michel.delorgeril.info/ethique-et-transparence/vaccins-et-autisme-les-faits...					13	pos	neg	pos	pos	neg	pos	neg
	14	https://www.huffingtonpost.fr/2019/03/06/vaccin-et-autisme-des-chercheurs-ont-etudie-600-000-enfants-sur-dix-ans-voici-leurs-resultats_a_23685585/	https://www.participate-autisme.be/go/fr/comprendre-l-autisme/comprendre-le-diagnostic/les-causes-de-l-autisme/autres-causes-de-l-autisme/le-vaccin-contre-la-rougeole.cfm	https://www.allodocteurs.fr/se-soigner/vaccins/vaccin-de-la-rougeole-et-autisme-les-sequelles-d-039-une-fraude_15701.html	https://www.lexpress.fr/actualite/societe/sante/autisme-le-danger-n-est-pas-le-vaccin...	https://www.allodocteurs.fr/se-soigner/vaccins/vaccin-de-la-rougeole-et-autisme-les-sequelles-d-039-une-fraude_15701.html	forum.doctissimo.fr/grossesse-bebe/Mamans-nature/reconnu-responsable-autisme-sujet_41082_1.htm	lemonde.fr/les-decodeurs/article/2016/09/16/idee-recue-n-2-les-vaccins...					14	pos	pos	pos	pos	pos	neutr	pos
	15	https://www.lexpress.fr/actualite/societe/sante/rougeole-une-etude-prouve-a-nouveau-que-vaccin-et-autisme-ne-sont-pas-lies_2065627.html	https://www.allodocteurs.fr/se-soigner/vaccins/vaccin-de-la-rougeole-et-autisme-les-sequelles-d-039-une-fraude_15701.html	https://michel.delorgeril.info/ethique-et-transparence/vaccins-et-autisme-les-faits-parfois-simposent/	https://www.youtube.com/watch?v=1oqfp32yEeU	https://naitreetgrandir.com/fr/nouvelles/2014/05/28/vaccination-autisme-fin-controverse/	autismesurordonnances.e-monsite.com/pages/livres-autismes-sur-ordonnances.html	allodocteurs.fr/se-soigner/vaccins/vaccin-de-la-rougeole-et-autisme-les...					15	pos	pos	neg	neg	pos	neg	pos
	16	https://www.lapresse.ca/sciences/medecine/201903/05/01-5217094-aucun-lien-vaccin-autisme-dit-une-autre-etude.php	https://lactualite.com/sante-et-science/vaccins-et-autisme-croire-ou-savoir/	https://www.allodocteurs.fr/se-soigner/vaccins/la-vaccination-en-questions/vaccin-et-autisme-l-absence-de-lien-confirmee_16148.html	https://theierecosmique.com/2018/07/16/les-amish-les-vaccins-et-lautisme	http://www.enfant-encyclopedie.com/vaccination/selon-experts/demystifier-le-ror-et-lautisme	https://levelevoile.fr/2019/10/lindeniable-correlation-entre-vaccination-et-autisme-que-les-autorites-rejettent/	naitreetgrandir.com/fr/nouvelles/2014/05/28/vaccination-autisme-fin-controverse					16	pos	pos	pos	neutr	pos	neg	pos
	17	https://www.courrierinternational.com/article/verbatim-aucun-lien-entre-autisme-et-vaccin-ror-confirme-une-etude	https://naitreetgrandir.com/fr/nouvelles/2014/05/28/vaccination-autisme-fin-controverse/	http://www.enfant-encyclopedie.com/vaccination/selon-experts/demystifier-le-ror-et-lautisme	https://www.huffingtonpost.fr/2014/05/20/autisme-vaccination-etude-australienne_n...	https://lactualite.com/sante-et-science/vaccins-et-autisme-croire-ou-savoir/	www.wikistrike.com/2019/03/une-etude-affirme-que-les-vaccins-ne-causent-pas-l-autisme.html	huffingtonpost.fr/2014/05/20/autisme-vaccination-etude-australienne_n...					17	pos	pos	pos	pos	pos	pos	pos
	18	https://www.francetvinfo.fr/sante/soigner/non-le-vaccin-contre-la-rougeole-ne-cause-pas-lautisme_3197387.html	https://aimsib.org/2018/03/24/vaccins-et-autisme-un-lien-statistique-desormais-demontre/	https://naitreetgrandir.com/fr/nouvelles/2014/05/28/vaccination-autisme-fin-controverse/	https://www.allodocteurs.fr/.../vaccin-et-autisme-l-absence-de-lien-confirmee_16148.html	https://informations.handicap.fr/a-vaccin-autisme-justice-10057.php	liberterre.fr/liberterres/pandemie/autisme.html	www.enfant-encyclopedie.com/vaccination/selon-experts/demystifier-le-ror-et-lautisme					18	pos	neg	pos	pos	neutr	neg	pos
	19	https://www.francetvinfo.fr/sante/soigner/big-data-contre-fake-news-pas-de-lien-entre-le-vaccin-ror-et-l-autisme_3220439.html	https://www.huffingtonpost.fr/2014/05/20/autisme-vaccination-etude-australienne_n_5352463.html	https://informations.handicap.fr/a-vaccin-autisme-justice-10057.php	https://pleinsfeux.org/les-vaccins-causent-lautisme	https://www.huffingtonpost.fr/2014/05/20/autisme-vaccination-etude-australienne_n_5352463.html	www.lemonde.fr/planete/article/2015/02/05/rougeole-vaccination-et-autisme-la-dispute-qui-enflamme-l-amerique_4570735_3244.html	lactualite.com/sante-et-science/vaccins-et-autisme-croire-ou-savoir					19	pos	pos	neutr	neg	pos	pos	pos
	20	https://blogs.mediapart.fr/jean-vincot/blog/051118/autisme-vaccins-retractation-dun-article	https://www.lexpress.fr/actualite/societe/sante/vaccins-ecrans-et-autisme-stop-aux-delires_1998624.html	https://www.lexpress.fr/actualite/societe/sante/vaccins-ecrans-et-autisme-stop-aux-delires_1998624.html	https://www.pharmacie.be/actualites/vaccin-rr0-pas-de-lien-avec-lautisme	https://www.lemonde.fr/les-decodeurs/article/2016/09/16/idee-recue-n-2-les-vaccins-peuvent-causer-l-autisme_4998678_4355770.html	www.brujitafr.fr/2016/10/la-relation-vaccination-et-allergies-alimentaire.html	informations.handicap.fr/a-vaccin-autisme-justice-10057.php					20	pos	pos	pos	pos	pos	neg	neutr
	21	http://www.leparisien.fr/societe/sante/non-le-vaccin-de-la-rougeole-des-oreillons-et-de-la-rubeole-ne-cause-pas-l-autisme-06-03-2019-8025585.php	https://www.allodocteurs.fr/se-soigner/vaccins/la-vaccination-en-questions/vaccin-et-autisme-l-absence-de-lien-confirmee_16148.html	https://www.youtube.com/watch?v=1oqfp32yEeU	https://www.ipsn.eu/vaccins-autisme-explications-dr-michel-de-lorgeril	https://www.sciencepresse.qc.ca/blogue/2013/11/13/lhistoire-trouble-vaccin-rougeole-lautisme	www.pearltrees.com/adalovelace/autism/id13585066	sciencepresse.qc.ca/.../2013/11/13/lhistoire-trouble-vaccin-rougeole-lautisme					21	pos	pos	neg	neg	pos	EXCLUDE	pos
	22	https://www.quechoisir.org/actualite-rougeole-non-le-vaccin-n-est-pas-a-l-origine-de-l-autisme-n64519/	http://www.enfant-encyclopedie.com/vaccination/selon-experts/demystifier-le-ror-et-lautisme	https://www.huffingtonpost.fr/2019/03/06/vaccin-et-autisme-des-chercheurs-ont-etudie-600-000-enfants-sur-dix-ans-voici-leurs-resultats_a_23685585/	https://www.consoglobe.com/vaccins-familles-denfants-autistes-attaquent-des-laborato...	https://www.youtube.com/watch?v=1oqfp32yEeU	www.healthglu.com/uncategorized/anti-vaccine-movement-affecting-kids-with-autism/	youtube.com/watch?v=1oqfp32yEeU					22	pos	pos	pos	neutr	neg	EXCLUDE	neg
	23	https://www.20minutes.fr/sante/2494739-20190418-antivax-faux-lien-entre-vaccin-ror-autisme-retour-histoire-fraude-consequences-importantes	https://www.youtube.com/watch?v=1oqfp32yEeU	https://pleinsfeux.org/les-vaccins-causent-lautisme/	https://www.youtube.com/watch?v=fAgFMLWGQt0	https://aimsib.org/2018/03/24/vaccins-et-autisme-un-lien-statistique-desormais-demontre/	www.parolesdedieu.fr/vaccinations-ror-etroitement-correlees-aux-cas-dautisme/	aimsib.org/2018/03/24/vaccins-et-autisme-un-lien-statistique-desormais-demontre					23	pos	neg	neg	pos	neg	neg	neg
	24	https://www.sante-sur-le-net.com/vaccin-ror-different-autisme/	https://www.sciencepresse.qc.ca/blogue/2013/11/13/lhistoire-trouble-vaccin-rougeole-lautisme	https://www.futura-sciences.com/sante/actualites/autisme-vaccins-autisme-aucun-lien-selon-plus-grande-etude-sujet-27221/	https://www.lapresse.ca/.../24/01-4864311-toujours-aucun-lien-entre-vaccin-et-autisme.php	https://www.allodocteurs.fr/se-soigner/vaccins/la-vaccination-en-questions/vaccin-et-autisme-l-absence-de-lien-confirmee_16148.html	blog.doctissimo.fr/petits-mensonges-epidemiologiques/vaccins-544603/vaccins-utilisent-calcultatrice-21361048.html	infovac.ch/fr/?option=com_gd&view=listing&fid=474&task=ofile					24	pos	pos	pos	pos	pos	pos	pos
	25	https://www.topsante.com/medecine/medicaments/grandes-familles-de-medicaments/non-le-vaccin-ror-ne-cause-pas-l-autisme-630946	https://pleinsfeux.org/les-vaccins-causent-lautisme/	https://blogs.mediapart.fr/jean-vincot/blog/240317/vaccins-autisme-le-film-dandrew-wakefield-vaxxed	https://michel.delorgeril.info/ethique-et-transparence/vaccins-et-autisme-les-faits...	https://www.infovac.ch/fr/?option=com_gd&view=listing&fid=474&task=ofile	rougeole-epidemiologie.overblog.com/2014/09/cdc-autisme-ror-et-lanceur-d-alerte.html	allodocteurs.fr/.../vaccin-et-autisme-l-absence-de-lien-confirmee_16148.html					25	pos	neg	pos	neg	pos	pos	pos
	26	https://www.liberation.fr/checknews/2019/01/29/non-les-vaccins-ne-causent-toujours-pas-l-autisme-lien-signale-sur-facebook_1705894	https://www.futura-sciences.com/sante/actualites/autisme-vaccins-autisme-aucun-lien-selon-plus-grande-etude-sujet-27221/	https://www.sciencepresse.qc.ca/blogue/2013/11/13/lhistoire-trouble-vaccin-rougeole-lautisme	https://vaccinclic.com/.../109-effets-secondaires-mediatises/46-autisme-et-vaccins-en-bref	https://www.lexpress.fr/actualite/societe/sante/vaccins-ecrans-et-autisme-stop-aux-delires_1998624.html	https://journals.ke-i.org/index.php/mra/article/view/1041	lexpress.fr/actualite/societe/sante/vaccins-ecrans-et-autisme-stop-aux...					26	pos	pos	pos	pos	pos	neg	pos
	27	https://proaidautisme.org/2019/03/28/aux-origines-de-la-fake-news-liant-vaccin-ror-et-autisme-charlene-catalifaud-le-quotidien-du-medecin/	https://www.infovac.ch/fr/?option=com_gd&view=listing&fid=474&task=ofile	https://www.consoglobe.com/vaccins-familles-denfants-autistes-attaquent-des-laboratoires-pharmaceutiques-cg	https://aimsib.org/2018/03/24/vaccins-et-autisme-un-lien-statistique-desormais-demontre	https://www.futura-sciences.com/sante/actualites/autisme-vaccins-autisme-aucun-lien-selon-plus-grande-etude-sujet-27221/	https://thetypewriter.fr/2015/01/29/briser-les-mythes-autour-des-vaccins-et-de-lautisme/	futura-sciences.com/sante/actualites/autisme-vaccins-autisme-aucun-lien...					27	pos	pos	neutr	neg	pos	EXCLUDE	pos
	28	https://www.sudouest.fr/2019/04/24/intox-sur-le-vaccin-ror-et-l-autisme-d-ou-vient-elle-5949751-4696.php	https://www.ipsn.eu/vaccins-autisme-explications-dr-michel-de-lorgeril/	https://www.e-sante.fr/vaccin-ror-autisme-point-final-polemique/actualite/474	https://www.huffingtonpost.fr/2019/03/06/vaccin-et-autisme-des-chercheurs-ont-etudie...	https://blogs.mediapart.fr/jean-vincot/blog/240317/vaccins-autisme-le-film-dandrew-wakefield-vaxxed	libcom.org/blog/anti-vaccination-crap-undermines-attempts-eradicate-measles-17012009	blogs.mediapart.fr/jean-vincot/blog/240317/vaccins-autisme-le-film-dandrew...					28	pos	neg	pos	pos	pos	pos	pos
	29	https://www.santemagazine.fr/actualites/actualites-sante/vaccin-ror-une-grande-etude-montre-quil-na-aucun-lien-avec-lautisme-337279	https://blogs.mediapart.fr/jean-vincot/blog/240317/vaccins-autisme-le-film-dandrew-wakefield-vaxxed	https://vaccinclic.com/index.php/109-effets-secondaires-mediatises/46-autisme-et-vaccins-en-bref	https://www.sciencepresse.qc.ca/actualite/2019/03/11/vaccin-autisme-etait-contraire	https://pleinsfeux.org/les-vaccins-causent-lautisme/	blogs.univ-poitiers.fr/n-yeganefar/2013/03/10/vaccination-consequences-funestes-de-la-peur/	pleinsfeux.org/les-vaccins-causent-lautisme					29	pos	pos	pos	pos	neg	pos	neg
	30	https://www.pourquoidocteur.fr/Articles/Question-d-actu/28482-Vaccins-vaste-etude-confirme-qu-il-n-y-lien-l-autisme	https://www.consoglobe.com/vaccins-familles-denfants-autistes-attaquent-des-laboratoires-pharmaceutiques-cg	https://www.francetvinfo.fr/sante/vaccins/video-vaccin-contre-la-rougeole-et-autisme-envoye-special-revient-sur-une-fausse-information_3432405.html	https://www.francetvinfo.fr/sante/soigner/non-le-vaccin-contre-la-rougeole-ne-cause...	http://sante.lefigaro.fr/article/une-vaste-etude-dement-une-nouvelle-fois-le-lien-entre-vaccin-et-autisme/	www.slate.fr/story/130010/plus-grand-danger-trump-propos-anti-vaccins	http://sante.lefigaro.fr/article/une-vaste-etude-dement-une-nouvelle-fois-le-lien-entre-vaccin-et-autisme/					30	pos	neutr	pos	pos	pos	pos	pos
